# Supplementary material for: The variability of nociplastic and central pain definition in literature: a scoping review
Source: medRxiv preprint, doi:10.1101/2022.09.23.22279813, version 1 (2022-09-25)
Supplement: Appendix B [file 279813_file02.docx]

**APPENDIX B**

|  | Elements |
| --- | --- |
| Article Details  -Article title  -Author(s)  -Year of pubblication  -Origin/country of origin  -Setting context  -Methodology/Methods  -Languages |  |
| Population  -Numbers  -Mean age  -Class of age  -Male  -Female  -Pathology (cronic and acute pain)  -Variables Factors |  |
| Concept  -Definition of nociplastic pain or central sensitization  -Tools used to assess the possibile presence of nociplastic pain or central sensitization mechanism |  |
